# Supplementary material for: Difficulties and flaws in performing accurate determinations of zeta potentials of metal nanoparticles in complex solutions—Four case studies
Source: PLoS One. 2017 Jul 27;12(7):e0181735. doi: 10.1371/journal.pone.0181735 (PMC5531457; doi:10.1371/journal.pone.0181735)
Supplement: S1 Fig — (DOCX) [file pone.0181735.s001.docx]

**Supporting information**

# Difficulties and flaws in performing accurate determinations of zeta potentials of metal nanoparticles in complex solutions – Four case studies

*Sara Skoglund,1 Jonas Hedberg,1* Elena Yunda,1,2* [*Anna Godymchuk*](https://www.researchgate.net/profile/A_Godymchuk)*,2,3 Eva Blomberg,1,4 Inger Odnevall Wallinder1*

1KTH Royal Institute of Technology, Division of Surface and Corrosion Science, School of Chemical Science and Engineering, SE-100 44 Stockholm, Sweden

2National Research Tomsk Polytechnic University, Tomsk 634050, Russia

3National University of Science and Technology “MISIS”, Moscow 119991, Russia

4RISE Research Institutes of Sweden, Chemistry, Materials and Surfaces, Sweden

*Corresponding author:

e-mail: [jhed@kth.se](mailto:jhed@kth.se) (JH)

**X-ray photoelectron spectroscopy**

Figure S1. XPS spectra of Cu 2p for Cu NPs of the different investigated exposure and preparation: unexposed, exposed in ultrapure water for 15 min, sonicated in ultrapure water for 15 min.
